# Supplementary material for: Two cytosolic glutamine synthetase isoforms play specific roles for seed germination and seed yield structure in Arabidopsis
Source: PubMed Central journal article supplement (PMC4265158; doi:10.1093/jxb/eru411), 2014-10-14
Supplement: supp_eru411_jexbot131805_file001.pdf [file supp_eru411_jexbot131805_file001.pdf]

## Supporting Information

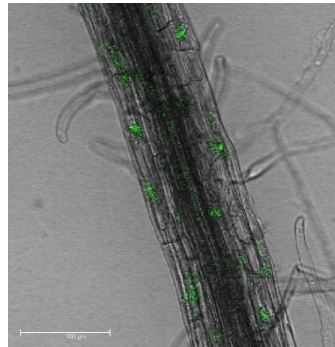

Figure S1. Localization of Gln1;1 in epidermis cells in the elongation zone of 3-week-old *Arabidopsis* roots. Bars = 100 μm.

# Supporting Information

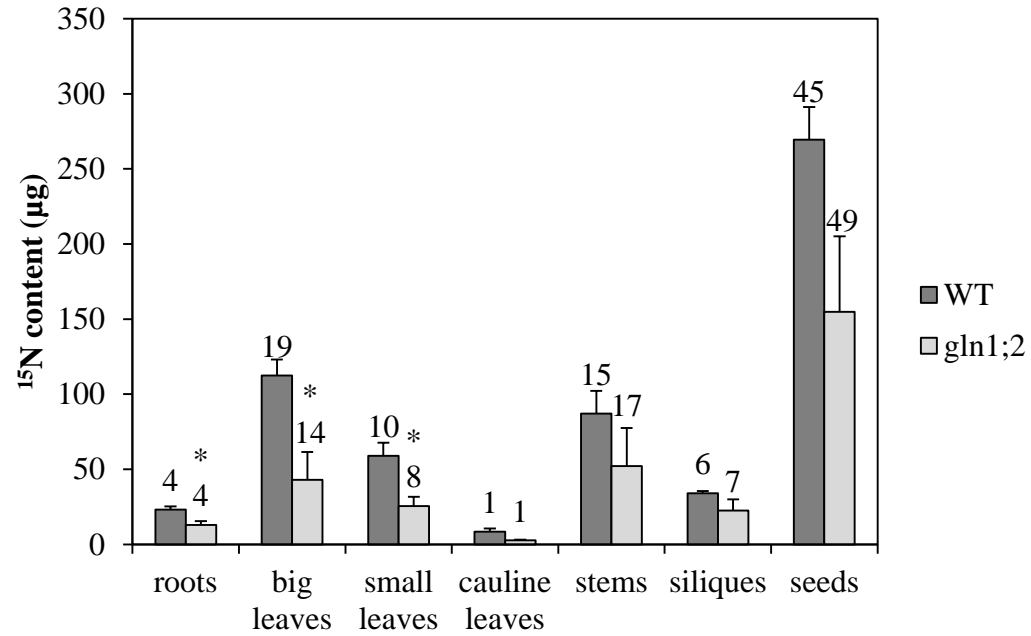

Figure S2.  $^{15}\text{N}$  content in different tissues of *gln1;2* and *Arabidopsis* Wt.
